# Supplementary material
Source: MDPI journal article supplement (https://www.mdpi.com/1999-4907/14/6/1257)
Supplement: s1 [file s1]

| Primer name    | Sequence                     | Target gene | Size (bp) |
|----------------|------------------------------|-------------|-----------|
| Ampelo-RdRp-F  | 5' ATCTTTACCTCCTCCAGCGC 3'   | RdRp        | 795       |
| Ampelo-RdRp-R  | 5' GAGATGTCCAACCCCCGAT 3'    |             |           |
| Ampelo-HSP70-F | 5' AACTGGCGGTAAGAGGTGTT 3'   | HSP70       | 806       |
| Ampelo-HSP70-R | 5' GCATCGACTAAGCGTACGTC 3'   |             |           |
| Ampelo-CP-F    | 5' GCGAAATTGAAGGGGAAAATCG 3' | CP          | 792       |
| Ampelo-CP-R    | 5' ACTCTGTTGCGCCAATTGC 3'    |             |           |
| Ampelo-MinCP-F | 5' TGAAGTGAAGAGTGGTGCGA 3'   | MinorCP     | 790       |
| Ampelo-MinCP-R | 5' ATTCGAGTACCCAACACCGT 3'   |             |           |

**Table S1:** Primers designed for the validation of *in silico* obtained sequence of LinAV-1
