# Supplementary material
Source: MDPI journal article supplement (https://www.mdpi.com/1999-4907/14/6/1257)
Supplement: s1 [file s1 › Figure S1.pdf]

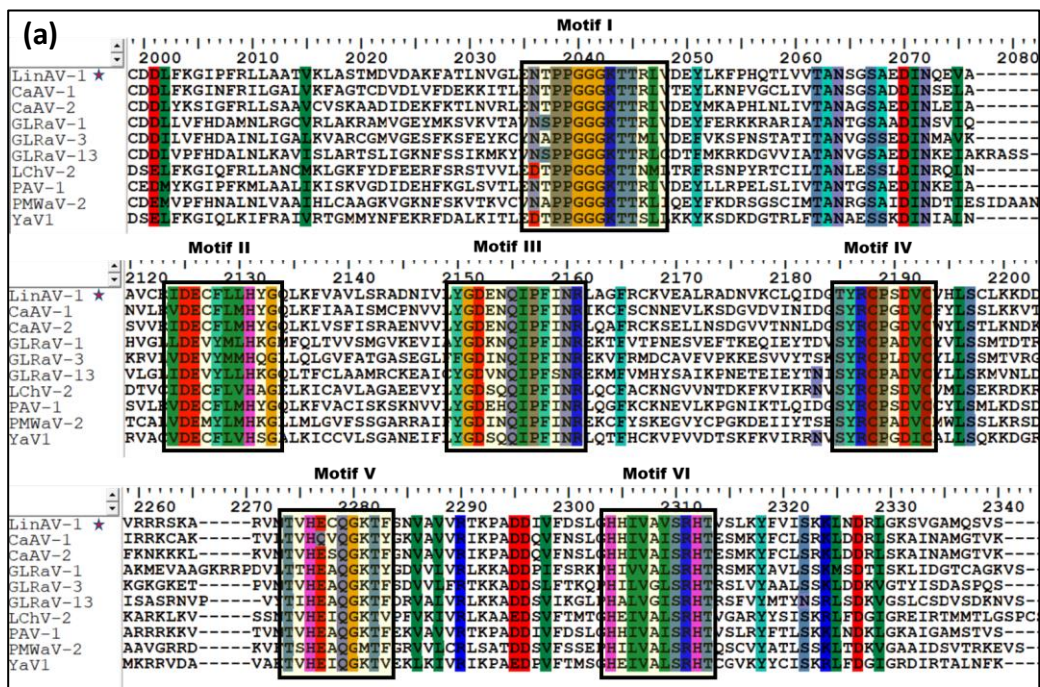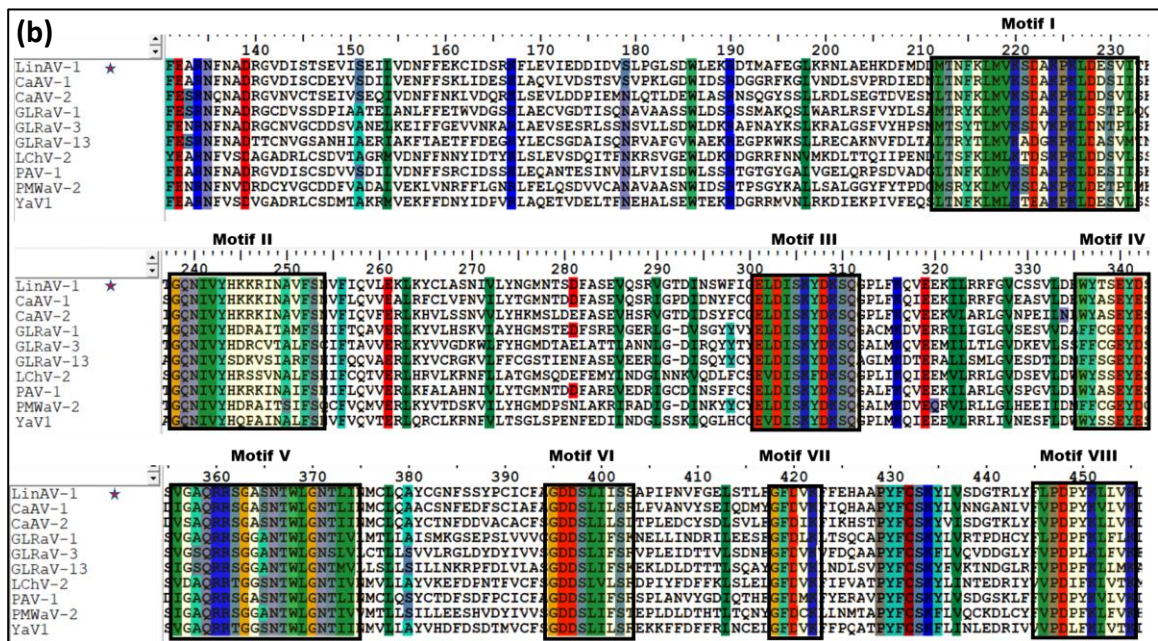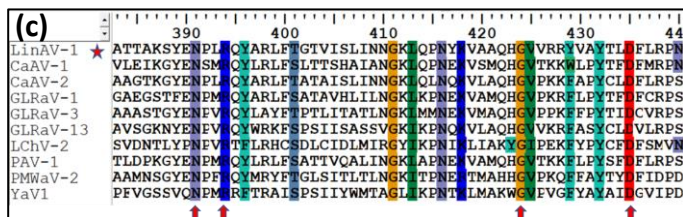

**Figure S1:** Ampelovirus conserved motifs (Black boxes) found in ORF1 (a) and RdRp(b), and CP(c) conserved residues (red arrows) identified in deduced aminoacid sequences from LinAV-1.
