# Supplementary material
Source: MDPI journal article supplement (https://www.mdpi.com/1999-4907/14/6/1257)
Supplement: s1 [file s1 › Figure S2.pdf]

(a)

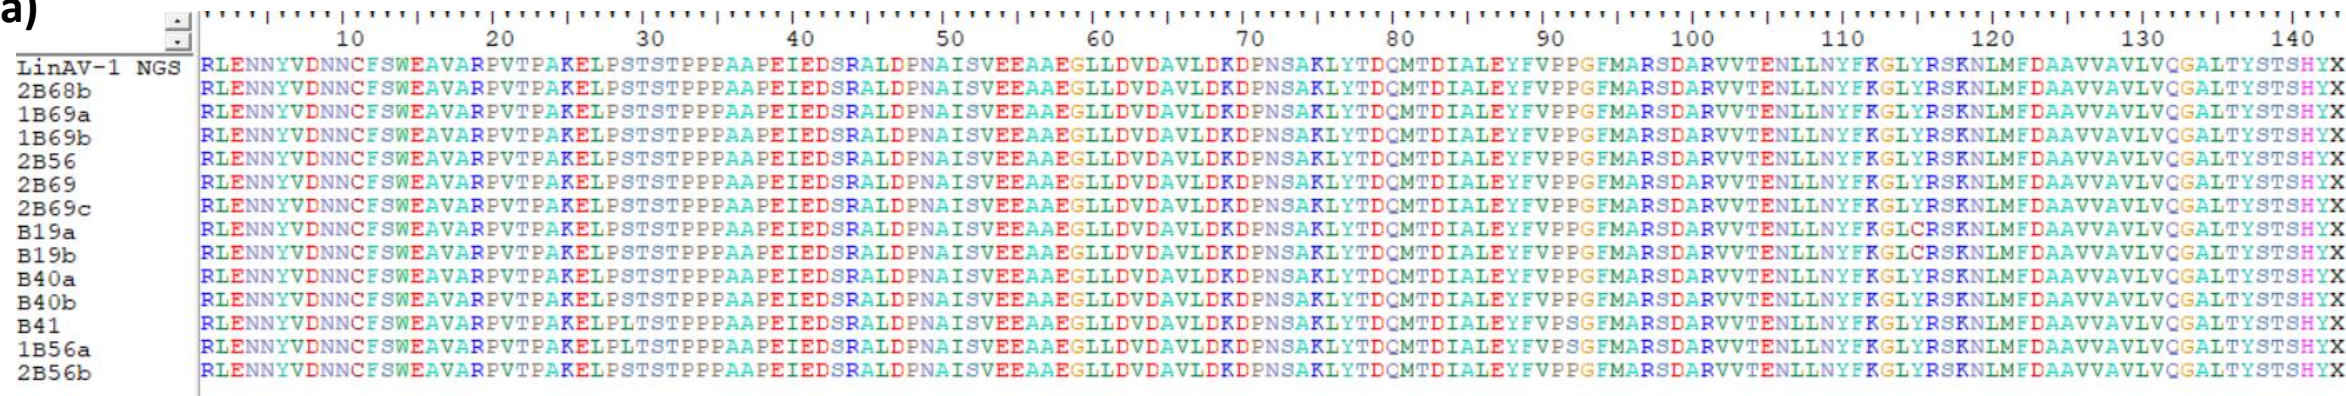

(b)

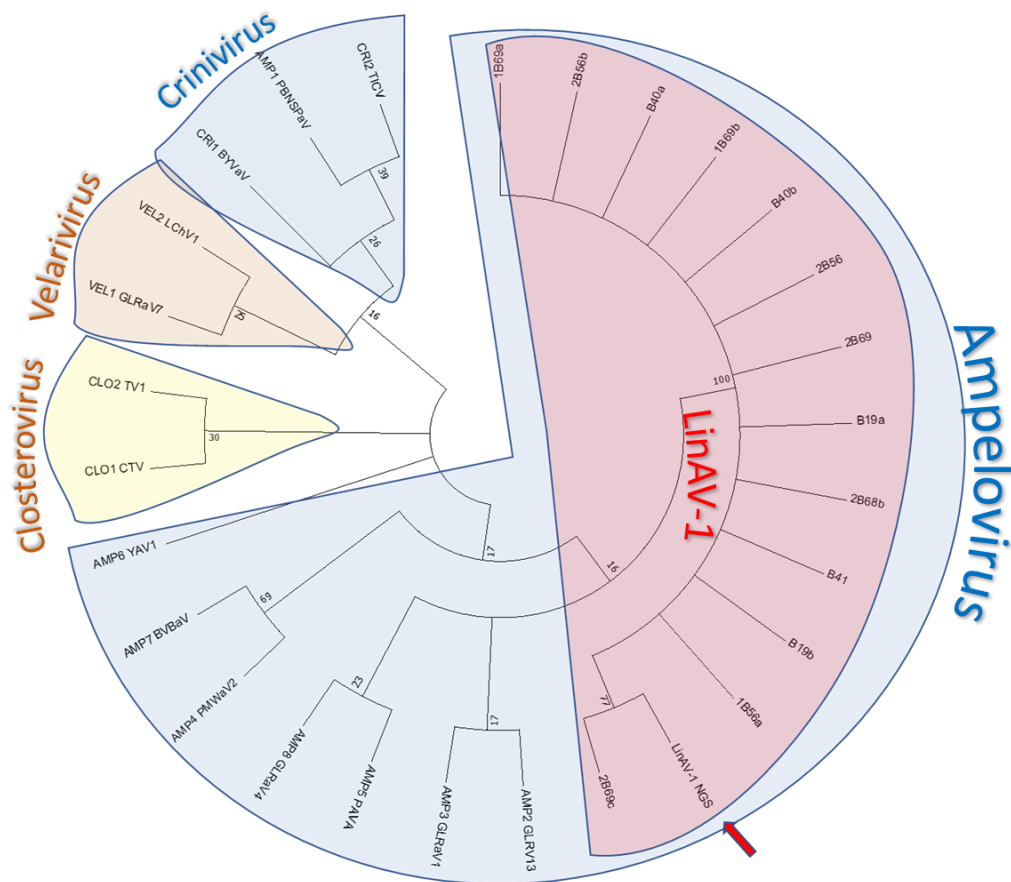

Figure S2: Validation of the detection of LinAV-1 in plants collected along Cantillana preserve by the alignment (a) and the phylogenetic tree constructed by maximum parsimony (b) of the deduced amino acid sequences of a partial region of CP gene.
